# Supplementary material for: Energy loss analysis in photoelectrochemical water splitting: a case study of hematite photoanodes
Source: Royal Society of Chemistry journal article supplement (doi:10.1039/c8cp04021d), 2018-01-01
Supplement: c8cp04021d1.pdf [file c8cp04021d1.pdf]

# Electronic Supplementary Information of

## Energy Loss Analysis in Photoelectrochemical

## Water Splitting: A Case Study of Hematite

## Photoanode

*Zhiliang Wang, Miaoqiang Lyu, Peng Chen, Songcan Wang and Lianzhou Wang\**

Nanomaterials Centre, School of Chemical Engineering and Australian Institute for  
Bioengineering and Nanotechnology The University of Queensland, QLD 4072 (Australia)

### AUTHOR INFORMATION

#### **Corresponding Author**

\*(Lianzhou Wang). E-mail: l.wang@uq.edu.au

## Net photocurrent

The net photocurrent used in Figure 1 is calculated by Eq. S1

$$j = j_{\text{light}} - j_{\text{dark}} \quad (\text{Eq. S1})$$

where  $j$  is the net photocurrent,  $j_{\text{light}}$  and  $j_{\text{dark}}$  is the current recorded under light or dark at the same scan rate.

## Fill factor

The item of fill factor (FF) is normally used in solar cell which is defined as the ratio of maximum output power over the theoretical power ( $j_{\text{sc}} \cdot V_{\text{OC}}$ , determined by short circuit current ( $j_{\text{sc}}$ ) and open circuit potential ( $V_{\text{OC}}$ ))

In the PEC system, the FF in Scheme S1 is usually defined as:<sup>1,2</sup>

$$FF = \frac{j_{\text{max}} (E_{\text{redox}} - E_{\text{max}})}{j_{\text{redox}} (E_{\text{redox}} - E_{\text{onset}})} \quad (\text{Eq. S2})$$

Here ( $j_{\text{max}}$ ,  $E_{\text{max}}$ ) is the point where there is the highest solar conversion efficiency,  $E_{\text{redox}}$  represents the redox potential of the reactant, which is 1.23 V vs RHE for water splitting. And  $j_{\text{redox}}$  is the photocurrent at the potential of  $E_{\text{redox}}$ .

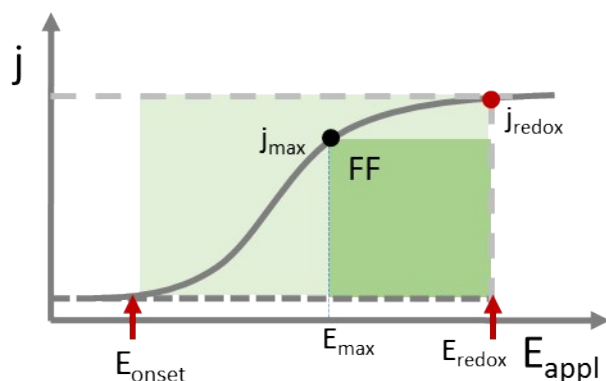

Scheme S1. The definition of fill factor (FF) for PEC research.

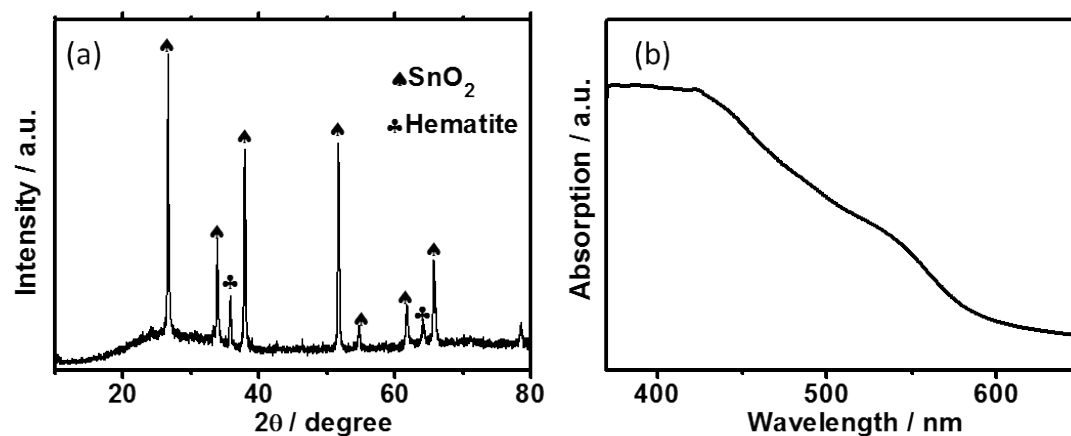

**Figure S1** (a) The XRD pattern and (b) absorption spectrum of hematite photoelectrode.

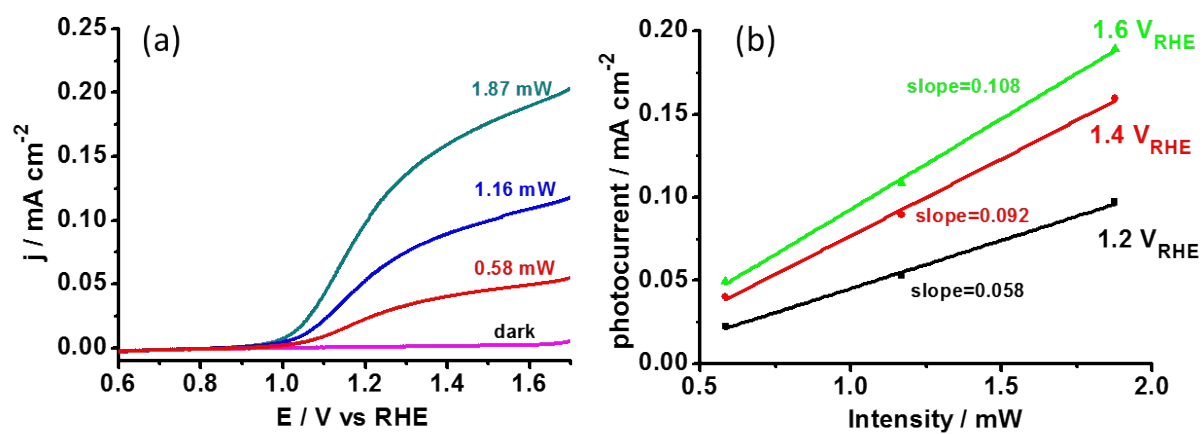

**Figure S2.** (a) The photocurrent-potential curves recorded under different intensity of monolight with a wavelength of 460 nm. (b) The photocurrent-light intensity curves under different bias.

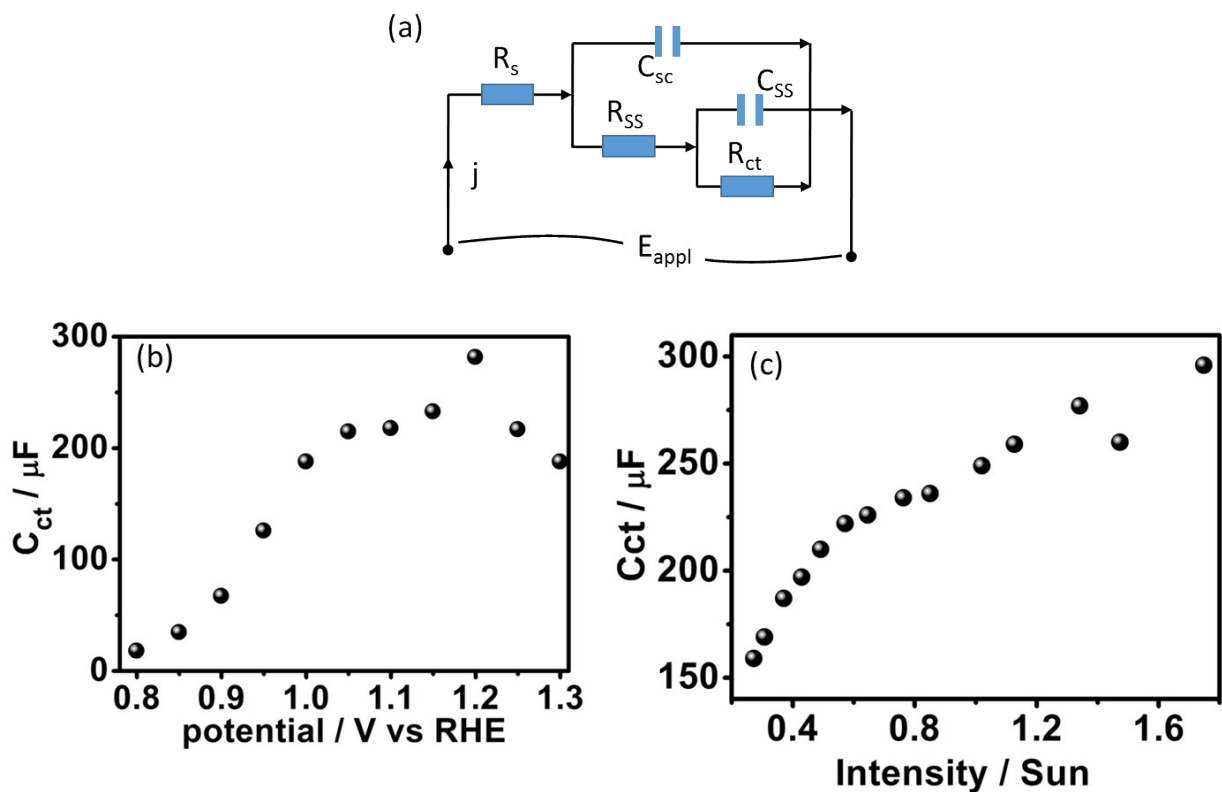

**Figure S3.** (a) The equivalent circuit of the photoelectrochemical process on hematite photoanode.  $R_s$  is the serial resistance generated by the electrode contact and electrolyte.  $C_{sc}$  is the space charge layer capacitance.  $R_{ss}$  is the resistance for charge capture by surface states.  $R_{ct}$  is the charge transfer resistance for water oxidation reaction. (b) The change of charge transfer resistance with the applied potential. The light intensity is 1 Sun. (c) The change of charge transfer resistance with the light intensity. The applied bias is 1.2 V<sub>RHE</sub>.

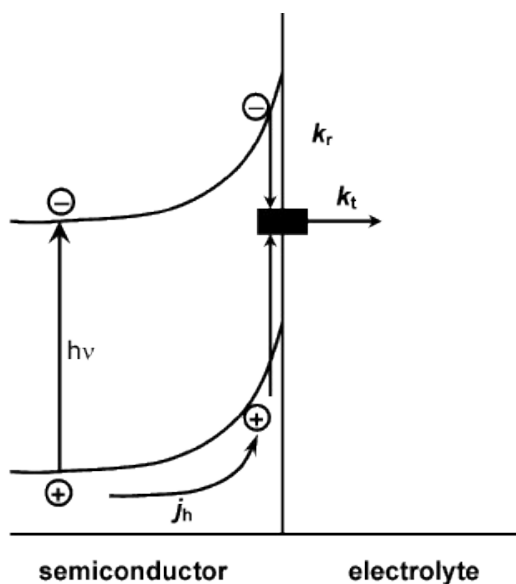

**Figure S4.** The schematic illustration of the charge transfer process on hematite.  $k_r$  and  $k_t$  is the rate constant of charge recombination and transfer process induced by the surface states. Adapted from Ref. 3.

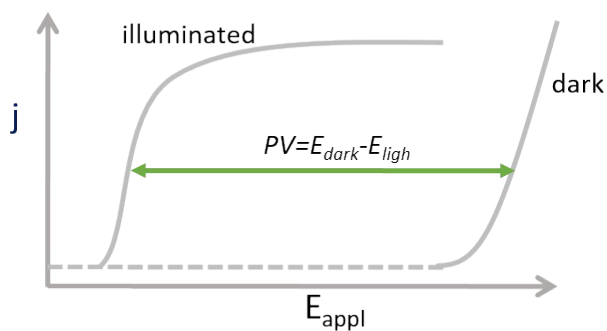

**Figure S5.** The schematic illustration of photovoltage (PV) generated during a PEC process. It is the voltage difference at the same current between dark and illuminated condition.

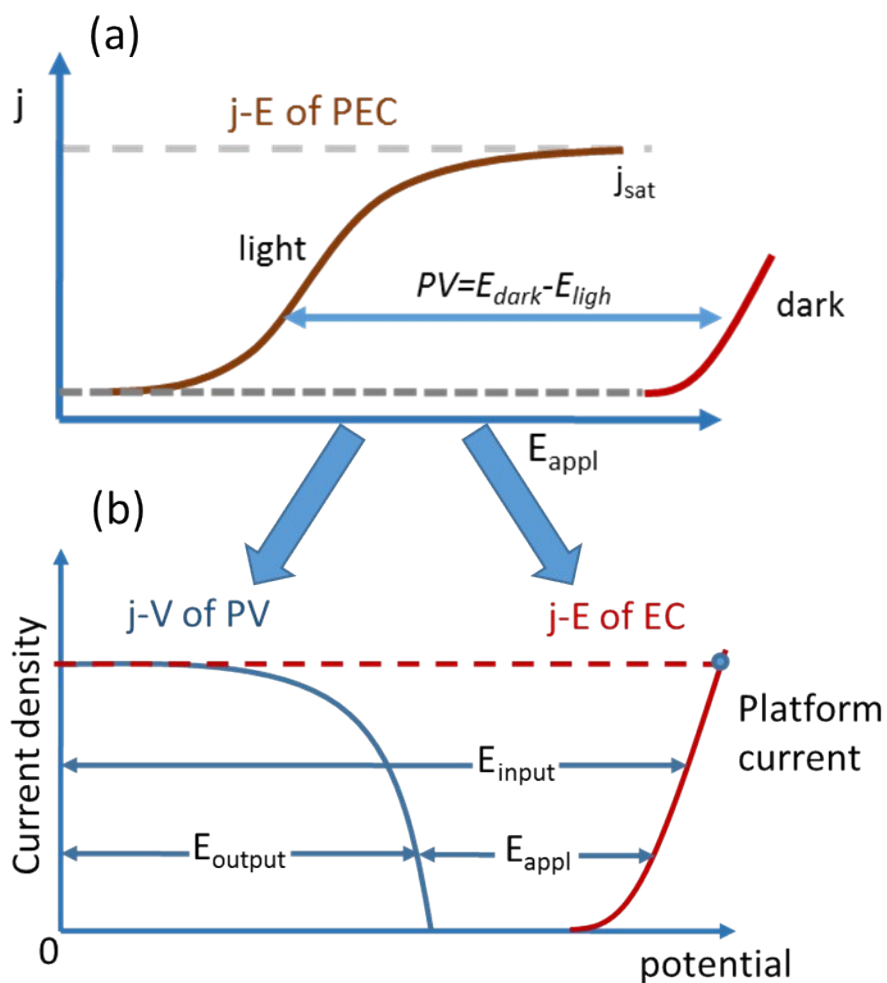

**Figure S6.** An illustration of how the  $j$ - $E$  of PEC (a) can be decoupled into  $j$ - $V$  of PV and  $j$ - $E$  of EC process (b). The PV in (a) is indeed equal to that in  $E_{output}$  of  $j$ - $V$ . And the  $E_{appl}$  in (b) is the applied bias of  $j$ - $E$  in (a).

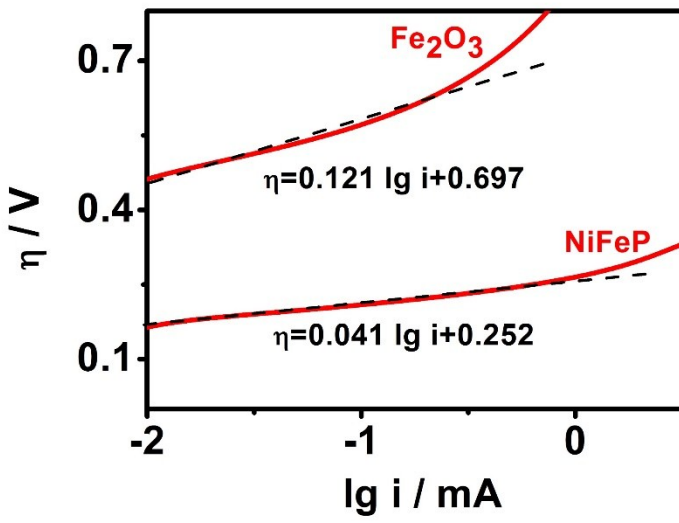

**Figure S7.** The Tafel plot of  $\text{Fe}_2\text{O}_3$  and  $\text{NiFeP}$  electrode. The much smaller Tafel slope and overpotential of  $\text{NiFeP}$  suggests profoundly better reaction kinetic than  $\text{Fe}_2\text{O}_3$ .

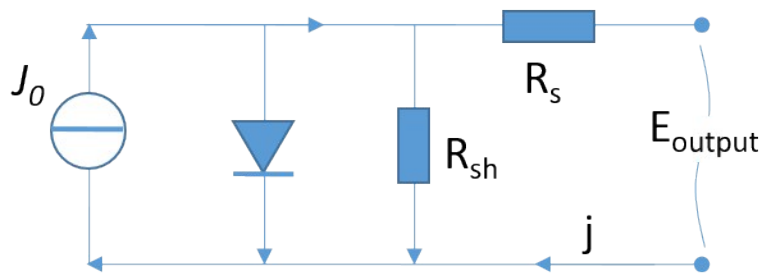

**Figure S8.** The equivalent circuit of solar cell.  $J_0$  is the ideal current source.  $R_{sh}$  and  $R_s$  are the shunt resistance and serial resistance, respectively.

Table S1. The parameters for numeric simulation in Figure 4a.

|          | Short circuit current<br>$J_{sc} / \text{mA}$     | Open circuit voltage<br>$V_{oc} / \text{V}$ | Fill factor<br>FF                           |
|----------|---------------------------------------------------|---------------------------------------------|---------------------------------------------|
| Curve I  | 3.5                                               | 1.0                                         | 0.85                                        |
| Curve II | 3.0                                               | 0.8                                         | 0.37                                        |
|          | Overpotential<br>$\eta(1 \text{ mA}) / \text{mV}$ | Tafel slope / $\text{mV dec}^{-1}$          | Exchange current<br>( $j_0$ ) / $\text{mA}$ |
| Curve i  | 400                                               | 59                                          | $10^{-3}$                                   |
| Curve ii | 534                                               | 166                                         | $3 \cdot 10^{-4}$                           |

Table S2. The measured  $j_{sc}$ ,  $V_{oc}$ , FF and PCE of the two perovskite solar cells.

|       | $j_{sc} / \text{mA}$ | $V_{oc} / \text{V}$ | FF    | PCE / % |
|-------|----------------------|---------------------|-------|---------|
| psc-1 | 3.6                  | 1                   | 0.675 | 14.6    |
| psc-2 | 2.5                  | 1.04                | 0.654 | 10.3    |

The area of the solar cell is  $0.165 \text{ cm}^2$ . And the light intensity is  $100 \text{ mW cm}^{-2}$  (AM 1.5 G).



## Reference:

- (1) Coridan, R. H.; Nielander, A. C.; Francis, S. A.; McDowell, M. T.; Dix, V.; Chatman, S. M.; Lewis, N. S. Methods for comparing the performance of energy-conversion systems for use in solar fuels and solar electricity generation. *Energy Environ. Sci.* **2015**, *8*, 2886-2901.
- (2) Kim, T. W.; Choi, K.-S. Nanoporous BiVO<sub>4</sub> photoanodes with dual-layer oxygen evolution catalysts for solar water splitting. *Science* **2014**, 1245026.
- (3) Wijayantha, K. U.; Saremi-Yarahmadi, S.; Peter, L. M. Kinetics of oxygen evolution at  $\alpha$ -Fe<sub>2</sub>O<sub>3</sub> photoanodes: a study by photoelectrochemical impedance spectroscopy. *Phys. Chem. Chem. Phys.* **2011**, *13*, 5264-5270.
